# Supplementary material for: Selenoprotein-Transgenic Chlamydomonas reinhardtii
Source: PubMed Central journal article supplement (PMC3705309; doi:10.3390/nu5030624), 2013-02-26
Supplement: nutrients-05-00624-s001.pdf [file nutrients-05-00624-s001.pdf]

## Supplementary Data

Primary sequences of three types of Sep15 fragments:

### (a) wtSep15

TAGCTAGC[ATG]CATCATCATCATCATCATGTGTCTGCTTTTGGGGCAGAGTTTTTCATCGGAGGCATGCAGAGAGTTAGGCT  
TTTCTAGCAACTTGCTTTGCAGCTCTTGTGATCTTCTCGGACAGTTCAACCTGCTTCAGCTGGATCCTGATTGCAGAGGATG  
CTGTCAGGAGGAAGCACAATTTGAAACCAAAAAGCTGTATGCAGGAGCTATTCTTGAAGTTTGTGGA[TGA]AAATTGGGA  
AGGTTCCCTCAAGTCCAAGCTTTTGTAGGAGTGATAAACCCAAACTGTTTCAGAGGACTGCAAATCAAGTATGTCCGTGG  
TTCAGACCCTGTATTAAGCTTTTGGACGACAATGGGAACATTGCTGAAGAAGTTCAGCATTCTCAAATGGAACACAGACA  
GTGTAGAAGAATTCCTGAGTGAAAAGTTGGAACGCATA[TAA]ATCTTGCTTAAATTTTGTCTATCCTTTTGTACCTTATC  
AAATGAAATATTACAGCACCTAGAAAATAATTTAGTTTGTCTTCCATTGATCAGTCTTTTACTTGAGGCATTAAATA  
TCTAATTAATTCGTGAAATGGCAGTATAGTCCATGATATCTAAGGAGTTGGCAAGCTTAACAAAACCCATTTTTTATAAAT  
GTCCATCCTCCTGCATTTGTTGATAACCAAAAATGCTTTGTAACAGACTTGCAGTTAATTATGCAAATGATAGTTTG  
TGATAATTGGTCCAGTTTACGAACAACAGATTTCTAAATTAGAGAGGTTAACAAGACAGATGATTACTATGCCTCATGTG  
CTGTGTGCTCTTTGAAAGGAATGACAGCAGACTACAAAGCAAATAAGATATACTGAGCCTCAACAGATTGCCTGCTCCTC  
AGAGTCTCCTATTTTTGTATTACCCAGCTTTCTTTTTAATACAAATGTTATTTATAGTTTACAATGAATGCACTGCATAA  
AACTTTGTAGCTTCATTATTGTAACATATTCAAGATCCTACAGTA[AGAGTGAAACATTACAAAAGATTTGCGTTAATG]  
[AAGACTACACAGAAAACCTTTCTAGGGATTTGTGTGGATCAGATACATACTTGGCAAATTTTTGAGT]TTTACATTCTTACA  
GAAAAGTCCATTTAAAAGTGATGTCGACGCG

### (b) Sep15ORF-hSECIS

TAGC[ATG]CATCATCATCATCATCATGTGTCTGCTTTTGGGGCAGAGTTTTTCATCGGAGGCATGCAGAGAGTTAGGCTTTTC  
TAGCAACTTGCTTTGCAGCTCTTGTGATCTTCTCGGACAGTTCAACCTGCTTCAGCTGGATCCTGATTGCAGAGGATGCTG  
TCAGGAGGAAGCACAATTTGAAACCAAAAAGCTGTATGCAGGAGCTATTCTTGAAGTTTGTGGA[TGA]AAATTGGGAAGG  
TTCCCTCAAGTCCAAGCTTTTGTAGGAGTGATAAACCCAAACTGTTTCAGAGGACTGCAAATCAAGTATGTCCGTGGTTCA  
GACCCTGTATTAAGCTTTTGGACGACAATGGGAACATTGCTGAAGAAGTTCAGCATTCTCAAATGGAACACAGACAGTGT  
AGAAGAATTCCTGAGTGAAAAGTTGGAACGCATA[TAA]ATCTTGCTTAAATTTTGTCTATCCTTTTCCATCGATGGTGCAT  
AAAACTTTGTAGCTTCATTATTGTAACATATTCAAGATCCTACAGTA[AGAGTGAAACATTACAAAAGATTTGCGTTA]  
[ATGAAGACTACACAGAAAACCTTTCTAAGGATTTGTGTGGATCAGATACATACTTGGCAAATTTTTGAGT]TTTACATTCTT  
ACAGAAAAGTCCATTTAAAAGTGATGTCGACGCGTATCTCTAGAG

### (c) Sep15ORF-chSECIS

TAGC[ATG]CATCATCATCATCATCATGTGTCTGCTTTTGGGGCAGAGTTTTTCATCGGAGGCATGCAGAGAGTTAGGCTTTTC  
TAGCAACTTGCTTTGCAGCTCTTGTGATCTTCTCGGACAGTTCAACCTGCTTCAGCTGGATCCTGATTGCAGAGGATGCTG  
TCAGGAGGAAGCACAATTTGAAACCAAAAAGCTGTATGCAGGAGCTATTCTTGAAGTTTGTGGA[TGA]AAATTGGGAAGG  
TTCCCTCAAGTCCAAGCTTTTGTAGGAGTGATAAACCCAAACTGTTTCAGAGGACTGCAAATCAAGTATGTCCGTGGTTCA  
GACCCTGTATTAAGCTTTTGGACGACAATGGGAACATTGCTGAAGAAGTTCAGCATTCTCAAATGGAACACAGACAGTGT  
AGAAGAATTCCTGAGTGAAAAGTTGGAACGCATA[TAA]ATCTTGCTTAAATTTTGTCTATCCTTTTCCATCGATGGACTGA  
GCACTGCCGCCCTGTCGCCCGGTCCCGGCAACTGATCACCTGCCAACCCGGCTGGCAACAAGG[TTTCTGTTTGGCGGGTT]  
GCTGGGTGAGACATGATGGGCGCGGGCTTTAAAGGGCTACAGGCCCTTGGTCCGCCCGGATGCAAATGATCACCTAGG  
CAACGCCAACTAGGAGGTCATGAGGCTGTGCCGTCGACGCGTATCT
